# Supplementary material for: Associations of Sex, Race, and Apolipoprotein E Alleles With Multiple Domains of Cognition Among Older Adults
Source: PubMed Central journal article supplement (PMC10352930; doi:10.1001/jamaneurol.2023.2169), 2023-07-17

## Supplemental Online Content

Walters S, Contreras AG, Eissman JM, et al; Alzheimer's Disease Neuroimaging Initiative, Alzheimer's Disease Genetics Consortium, and Alzheimer's Disease Sequencing Project. Associations of sex, race, and apolipoprotein E alleles with multiple domains of cognition among older adults. *JAMA Neurol*. Published online July 17, 2023. doi:10.1001/jamaneurol.2023.2169

**eFigure 1.** Forest plots of significant APOE- $\epsilon$ 4\*sex interactions

**eFigure 2.** Forest plots of significant APOE- $\epsilon$ 2\*sex interactions

This supplemental material has been provided by the authors to give readers additional information about their work.

### eFigure 1. Forest plots of significant *APOE*- $\epsilon$ 4\*sex interactions

For the purpose of comparison, individual cohort-level results are provided for associations with *APOE*- $\epsilon$ 4 that show evidence of significance. ADNI=the Alzheimer’s Disease Neuroimaging Initiative; ROSMAP=the three harmonized cohorts of the Religious Orders Study, Rush Memory and Aging Project, and Minority Aging Research Study; NACC=the National Alzheimer’s Coordinating Center; ACT=Adult Changes in Thought; NHW=non-Hispanic Whites; NC=normal cognition

#### A. All races, baseline memory~sex\**APOE*- $\epsilon$ 4 (all diagnoses)

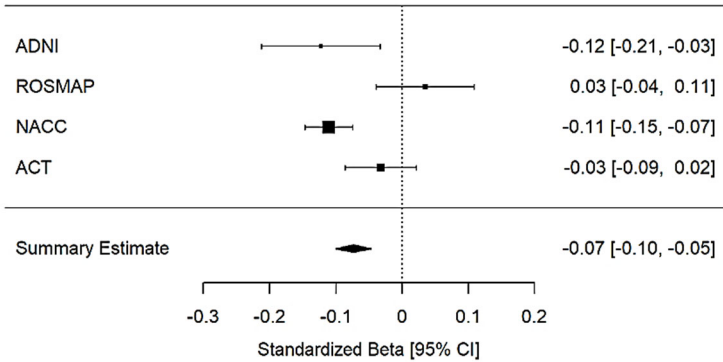

#### B. All races, baseline language~sex\**APOE*- $\epsilon$ 4 (all diagnoses)

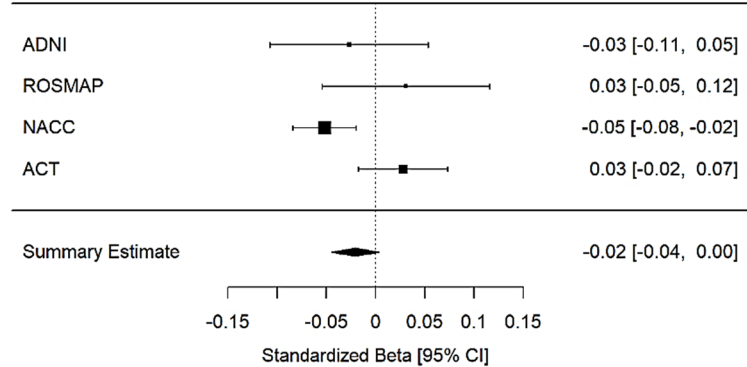

#### C. All races, baseline executive function~sex\**APOE*- $\epsilon$ 4\*race (NC)

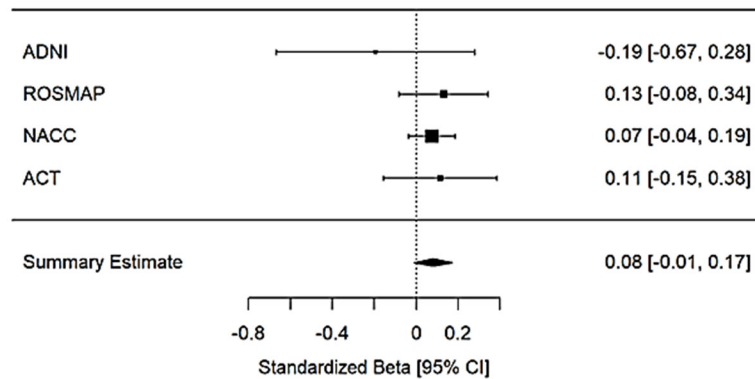

## eFigure 2. Forest plots for significant *APOE-ε2*\*sex interactions

For the purpose of comparison, individual cohort-level results are provided for associations with *APOE-ε2* that show evidence of significance. ADNI=the Alzheimer's Disease Neuroimaging Initiative; ROSMAP=the three harmonized cohorts of the Religious Orders Study, Rush Memory and Aging Project, and Minority Aging Research Study; NACC=the National Alzheimer's Coordinating Center; ACT=Adult Changes in Thought; NHW=non-Hispanic Whites; NHB=non-Hispanic Blacks; NC=normal cognition

### A. All races, baseline executive function~sex\**APOE-ε2*\*race (NC)

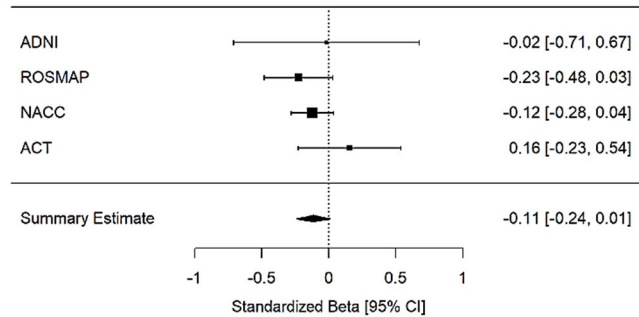

Supplement: jamaneurol-e232169-s001.pdf [file jamaneurol-e232169-s001.pdf]
