# Supplementary material for: Associations of Sex, Race, and Apolipoprotein E Alleles With Multiple Domains of Cognition Among Older Adults
Source: PubMed Central journal article supplement (PMC10352930; doi:10.1001/jamaneurol.2023.2169), 2023-07-17
Supplement: jamaneurol-e232169-s004.pdf [file jamaneurol-e232169-s004.pdf]

## Data Sharing Statement

### Data

**Data available:** Yes

**Data types:** Other (please specify)

**Additional Information:** Data is publicly available to qualified investigators.

**How to access data:** Data from ADNI is shared through the LONI Image and Data Archive

(<https://ida.loni.usc.edu/>). Data from ROS/MAP/MARS can be requested at

[www.radc.rush.edu](http://www.radc.rush.edu). Data from NACC can be accessed at <https://naccddata.org/>. Data from ACT can be accessed through the Data Query Tool (<http://act.kpwwashingtonresearch.org/dqt/>).

**When available:** With publication

### Supporting Documents

**Document types:** None

### Additional Information

**Who can access the data:** Data will be made available to qualified investigators with IRB approval.

**Types of analyses:** Data will be made available to any qualified investigator.

**Mechanisms of data availability:** Data will be made available following data access approval through our data portal (<https://www.vmacdata.org/vmap/data-requests>).
